# Supplementary material for: The Core Components of Organelle Biogenesis and Membrane Transport in the Hydrogenosomes of Trichomonas vaginalis
Source: PLoS One. 2011 Sep 15;6(9):e24428. doi: 10.1371/journal.pone.0024428 (PMC3174187; doi:10.1371/journal.pone.0024428)
Supplement: Figure S3 — Protein sequence alignment of candidate porin_3 family proteins in hydrogenosomal membranes. The secondary structure of all of the protein sequences, as predicted by PSIPRED, is shown above the protein alignment. Predicted beta-strands are in green, and predicted alpha helixes are in purple. The presence of the beta-signal is highlighted in red. (PDF) [file pone.0024428.s003.pdf]

[illegible]

HHHHCC C EEEEEEEECC CCC EEEEEEEECC EEEECCCC EEEEEECCCC EEEECCCCCC  
EEEECCCCC EEEEEEEECCC CCC EEEEEEEECCC EEEECCCCC EEEEEECCCCC EEEECCCCCC  
EEEECCCCC EEEEEEEECCC CCC EEEEEEEECCC EEEECCCC EEEEEECCCC  
HHHCCCCC EEEEEEEECCCCC EEEECCCC EEEECC EEEECCCCC HHHHHHHHH CEEEECCCCCCCC  
EEEECCCCC EEEEEEEECCC EEEEEEEE HHHCC EEEECCCCC EEEEEECCCCC EEEECCCC HHHHHH  
EEEECCCCC EEEECC HHHHCC HHHHHHHHH EEEEEEEECCCCC HHHHHH EEEEEECCCCC HHHHHH  
EEEECCCCCCCC EEEECCCC EEEEEEEECCCCCCCC EEEECCCCC EEEECCCC EEEECCCCC EEEECCCCC  
EEEECCCCC EEEECCCC EEEECCCC EEEECCCC EEEECCCC EEEECCCC

Tom40-1 YIRKLK-NNNGFISYAISTA-LLPYLTIASTVELGR---SKVQTVNSDK-LISSLYSVKVSNDNMNFCIGTLNHHK--- 290  
Tom40-3 YQRQVNNWKKGFITTFATSKY-IEPRQLTCKANLKG---STVHSSLLTGVGVSEKTFQKQVDTFTTIVASILDHPHCK--- 294  
Tom40-2 HKHEINDKLTVGASATADSN-LNSKVELATYKNAVND---AIHSSDITKLVNSVTYVKQSLYPOCNILLVLDHDKNA--- 274  
Tom40-4 LVKTINPQLSVGLQVRVNRMPAAVADLSWYTNKD---TQVHSIISTNGDVSFELSRKLNKVALNVNCLNLHEA--- 284  
Tom40-5 GTHHPDSKTVSSAGVLPNSLTQDILDFGQAFRMS---SKVASMNTKSGSVGFQKDVKNEKYSIISFADHFQK--- 281  
Tom40-6 ITYSPNEDTTSAGIQLDILPSBLRKAASAFINRNFAM---TVFAFNVTSDATISGVSGLRFGKGYQMTLTSQADIFPK--- 287  
Porin-1 SIYHPNRLNPLGANFTIISHIGHEPYLFMIGCSNIDGSSIRSIPSRSDSKASFELNVPVKNFLKMTPTGNFVYSRANKL 269  
Porin-2 LITSDDPKVRISISYLRANPFTFDSATPGIIFPGNSGNISFISIPKTSIRFEAALNLQYEDDKSGITVYVWPSFN--- 283

```

C#####CCCCCCCC
CC#####CC
CCC#####CCCC
CCC#####CCCC
HHH#####CCCC
HHH#####CC
CCCC#####C
CCCCCC
Tom40-1  SVYILGLGVNIPDDFVST 308
Tom40-3  NYLILGLGYIQ----- 305
Tom40-2  QYNFLGLQVQNVNSTN-- 296
Tom40-4  DYSFIDISNQ----- 290
Tom40-5  LYSFLGMAISVRTSSD-- 297
Tom40-6  HYNFLGLGVVA----- 298
Porin-1  NSNFFAVLIDDKK----- 302
Porin-2  ---TIKSVLA----- 270

```
