# Supplementary material for: The Core Components of Organelle Biogenesis and Membrane Transport in the Hydrogenosomes of Trichomonas vaginalis
Source: PubMed Central journal article supplement (PMC3174187; doi:10.1371/journal.pone.0024428), 2011-09-15
Supplement: pone.0024428.s004.pdf [file pone.0024428.s004.pdf]

|         |            |             |            |             |             |             |     |
|---------|------------|-------------|------------|-------------|-------------|-------------|-----|
| Hmp35-1 | MEPKTFETVG | DEATKLNKIP  | GLGVCVEENG | TKVGVFTDLQ  | LQNPSINSSF  | KLP-VGTVDC  | 59  |
| Hmp35-2 | MEPKTFETVG | DEATKLNKIP  | GLGVCVEENG | TKVGVFTDLQ  | LQNPSINSSF  | KLP-VGTVDC  | 59  |
| Hmp36-1 | MEPIKYEKLK | KKFTEIEFKP  | GVAVTLKQKK | AECVLSVDEK  | IENPALSAEF  | KVKKAGKAIV  | 60  |
| Hmp36-2 | MNPDSYKKIG | QKLTKLEYQS  | GFAVTLKYKK | TKTTASCDEE  | FATPALTSEF  | KVKKVGGKIQC | 60  |
| Hmp35-1 | NIADKGVVGV | VLKPDLLKQHG | VTVSINPIEK | NFTFSVKKEC  | TCTHYEATLG  | YNSAKKAAEA  | 119 |
| Hmp35-2 | NIADKGVVGV | VLKPDLLKQHG | VTVSINPIEK | NFTFSVKKEC  | TCTHYEATLG  | YNSAKKAAEA  | 119 |
| Hmp36-1 | GFA-EGKPQI | SIIPKLDKIK  | TELTINPLEN | TFVFSTKKKI  | KKMKTKAIFG  | FDSAKLAPSL  | 119 |
| Hmp36-2 | GFK-DGKSQL | IFSPKLEKLD  | AKLDFNAIDN | SFLFEYAKKV  | KPINSLVTIK  | YDSAKNEPSV  | 119 |
| Hmp35-1 | HLYKQFAVKD | SKVNCYLDIT  | GVNNTKPDVN | YRIRYDLDKI  | GLRITYWD--G | KDQRFAAFLLD | 177 |
| Hmp35-2 | HLYKQFAVKD | SKVNCYLDIT  | GVNNTKPDVN | YRIRYDLDKI  | GLRITYWD--G | KDQRFAAFLLD | 177 |
| Hmp36-1 | LLMPKFKVVK | MKVHADILLK  | KPEEDLPPVL | FDAQAKIKKV  | NFVACFDEES  | KEYQAGVFAK  | 179 |
| Hmp36-2 | LIQPKFKLKN | INFANLLEFK  | KPVENCPPVI | FQAHAAAYKKL | FLCSCFNTEE  | KEYRAAAFAK  | 179 |
| Hmp35-1 | LKKAMIG-TH | FFFN----KA  | VKSVDIYGLK | SFKCGKASLI  | ATVLGEQR-C  | RLNFEG-CCK  | 230 |
| Hmp35-2 | LKKAMIG-TH | FFFN----KA  | VKSVDIYGLK | SFKCGKASLI  | ATVLGEQR-C  | RLNFEG-CCK  | 230 |
| Hmp36-1 | IAKKLHAGAL | FHFQPTQENL  | LASIDLYSKL | KYKGHKAGLI  | VSSLQTG---  | KFNAQKGLGK  | 236 |
| Hmp36-2 | LFKGIHAGAL | LHFDPLAEKQ  | MKAVDVFAKY | SFKKKGKIAAI | TTLLEGEKPVV | KVNAKAKVGG  | 239 |
| Hmp35-1 | DCSYGAKIDY | LHGEKPEITA  | KFGGASKCCS | HFSCYKYLATV | TKKEA--TTF  | GIQTSGETFPL | 288 |
| Hmp35-2 | DCSYGAKIDY | LHGEKPEITA  | KFGGASKCCS | HFSCYKYLATV | TKKEA--TTF  | GIQTSGETFPL | 288 |
| Hmp36-1 | KVKYGLNVNY | DKD----ING  | SFG-IKADLK | KMDLNLVLKA  | TKEAEKEITP  | GLLGEAKFKI  | 291 |
| Hmp36-2 | KAKIGINTVY | GET----ITG  | DFG-VKADLK | KFKLNLIVNA  | KKESD-EISE  | GLIAQTAFKV  | 293 |
| Hmp35-1 | HGFGKATVGC | ALADVKDYKN  | IGYSFLVE-- | -           | -           | -           | 316 |
| Hmp35-2 | HGFGKATVGC | ALADVKDYKN  | IGYSFLVELN | -           | -           | -           | 318 |
| Hmp36-1 | KKLGKAKVGL | SIPNLSDAKE  | INYFVNLKIK | D           | -           | -           | 322 |
| Hmp36-2 | KRVGKAKVGV | AIPSIQEAQK  | AHLFVNLKIK | D           | -           | -           | 324 |
