# Supplementary material for: The Core Components of Organelle Biogenesis and Membrane Transport in the Hydrogenosomes of Trichomonas vaginalis
Source: PubMed Central journal article supplement (PMC3174187; doi:10.1371/journal.pone.0024428), 2011-09-15
Supplement: pone.0024428.s006.pdf [file pone.0024428.s006.pdf]


  
 TvPam16 ----- CHHHHHHHH HEECCHHHHH HHHHHHHHHH HHCCCCCHH 39

S.cerevisiae Pam16 ----- -MVIVELAGL VISSTKVVCS TFINGFKHAA AANAPGNAF 37

H.sapiens Pam16 ----- -MAHRAFIQV IITGTQVFGK AFAEAYRQ-- AASQSVKQGA 38

D.discoideium Pam16 ----- -MAARL IAKIVFTSGT VLVRSIQ MAY KQALLQAES- 34

E.cuniculi Pam16 ----- -ME AGKALMVLLG EGSK---VL WKA AVK--- 24

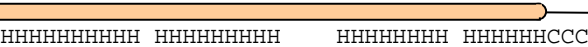
  
 TvPam18 -----MSIVNK FVEKALSLPT YAKAAIGAG- --VGLGVTSA VFSLFHTDKV 43

S.cerevisiae Pam18 MX<sub>35</sub> VGIQNG SQGQKTGMDL YFDQALNYMG EHPVITGFGA FLTLYFTAGA YKSISKGLNG 59

H.sapiens Pam18 MASTVVAVGL TIAAAGFAGR YVLQAMKHME PQVKQ-----V FQSLPKS--- 43

I. helix II. helix + ∇∇ +

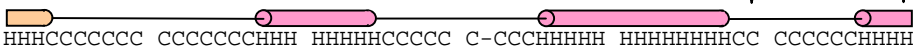
  
 TvPam16 HHHCCCCCCC CCCCCCHHH HHHHHCCCCC C-CCCHHHH HHHHHHHHCC CCCCCCHHH 98

S.cerevisiae Pam16 QKFAGAVFGI QFQTRMMPDE ARQILGFQEK D-KLDIKSIK EHLDRMIKLN DLEKGGSPYL 97

H.sapiens Pam16 GRAGHRSAAA SNLSGLSLQE AQQILNVS-- --KLSPEEVQ KNYEHLFKVN DKS VGGSFYL 94

D.discoideium Pam16 -GMGAAAGSM DVKSKMSPIE ARKILGLEN- VETVSKEDID KKYNELLTIN DPKDGGSEYL 92

E.cuniculi Pam16 -TASDIIIFRD ----RMSRME AEMVLDVTP- --STDKDKVR DAFLRIYCSN SKENGGSPYI 76


  
 TvPam18 CCCCCCCCC CCCCCCHHH HHHHHCCCC CCCHHHH HHHHHHHHH CCCCCCHHH 100

S.cerevisiae Pam18 VGLPPAANLN GFAPTLTRKE AELILNLPP- --NYTNQDIQ KHHRTLMLALH HPDKGGSPYI 117

H.sapiens Pam18 GKSTTAFLKG GFDPKMSKE ALQILNLTEN --TLTKKKLK EVHRKIMLAN HPDKGGSPFL 117

H.sapiens Pam18 -AFSGGYR GFEPMKTKRE AALILGVSP- --TANKGKIR DAHRRIMLLN HPDKGGSPYI 99

III. helix


  
 TvPam16 HHHHHHHHHH HCC

S.cerevisiae Pam16 NERFIAASHV LAK----- 111

H.sapiens Pam16 QSKVYRAAER LKWELAQREK NAKAKAGDAS TAKPPPSTN SSGADNSASS NQ 149

D.discoideium Pam16 QSKVVRAKER LDEELKIQAQ EDREKGQMPH T----- 125

E.cuniculi Pam16 QIKISGAKHC LHSALKEGKK I----- 113

E.cuniculi Pam16 QSRALAAAYTV LSNTSLD-PP DCPSPETHQE AN-VSILSAK NKRT----- 118


  
 TvPam18 HHHHHHHHHH HHHCCCC

S.cerevisiae Pam18 ATKVNESRDF LTVGIRA--- 117

H.sapiens Pam18 ATKINEAKDF LEKRGISK-- 135

H.sapiens Pam18 AAKINEAKDL LEGQAKK--- 116
