# Supplementary material for: The Core Components of Organelle Biogenesis and Membrane Transport in the Hydrogenosomes of Trichomonas vaginalis
Source: PubMed Central journal article supplement (PMC3174187; doi:10.1371/journal.pone.0024428), 2011-09-15
Supplement: pone.0024428.s007.pdf [file pone.0024428.s007.pdf]

|              |             |             |            |            |            |             |     |
|--------------|-------------|-------------|------------|------------|------------|-------------|-----|
| T.vaginalis  | ~~~NAFIRVP  | FQALANASSV  | VVSKLTQPSK | EQLVQMSIQM | YYPTFTISEF | KQWIEKSFLP  | 200 |
| S.cerevisiae | ~~~NPLIVV-  | MRKITNKVG-  | ---GFFAETE | SSRVYSQFKL | MDPTFSNESF | TRHLREYIVP  | 299 |
| S.pombe      | ~~~HPIVSS-  | IRDMADSISG  | VWSRMFSETE | ASQVMRRFKE | IDPSFNTEHF | LQYLREYIVP  | 295 |
| P.infestans  | ~~~EVWETS-  | QNPWVYRLSS  | IYDGLFGETP | MAVAIKEIRR | AEPDFILEEW | KENIEEVVLP  | 339 |
| T.castaneum  | ~~~NPVIRA-  | SRLLTDKVSD  | IMGGLFQKTE | LSETLTEICK | IDPTFDTKKF | LKQCETDIIP  | 297 |
| H.sapiens    | ~~~NAFIRA-  | SRALTDKVD   | LLGGLFSKTE | MSEVLTEILR | VDAFADKDRF | LKQCENDIIP  | 325 |
| C.elegans    | ~~~NMAVRM-  | MRGVTEKIGS  | VFSG---QNE | VSEVLTEIHK | IDANFDKQEW | LRFCETKIIP  | 297 |
| C.crestentus | ~~~RRVGRQP  | EDAAVTAMPG  | AAPAPVDPVL | QAEGVATLRA | RQEDFDPARF | LMGVR-AAAYE | 118 |
|              |             |             |            |            |            |             |     |
| T.vaginalis  | VLLERYLRGN  | IKQLEELTSQ  | QVAKERQLAV | VQFLSNRLII | -RTKLLSITD | VDIMGFDFTN  | 259 |
| S.cerevisiae | EILEAYVKGD  | VKVLKKWFSE  | APFNVYAAQQ | KIFKEQDVYA | -DGRILDIRG | VEIVSAKLLA  | 358 |
| S.pombe      | EVTEAYVKGD  | KEVLKTLWSE  | APFSVYETTT | KEYAKHGVS  | -VGKILDIRG | VDIMSQRLLQ  | 354 |
| P.infestans  | GVLEAFLRGN  | SRDLKKWFE   | AAYSRMNIAI | RERKSEGLVM | -DPHVLSIDN | VEVIEATAED  | 398 |
| T.castaneum  | NILEAMTRGD  | LEVLIKDWCHE | GPFNLFAIPI | KEAYKKGYKI | -DSKVLDVDN | VDLVMGKVME  | 356 |
| H.sapiens    | NVLEAMISGE  | LDILKDWCYE  | ATYSQLAHPI | QQAKALGLQF | -HSRILDIDN | VDLAMGKMM   | 384 |
| C.elegans    | NILEAFIRFD  | LEVLSQSWCHE | RAYTQLSTVV | KEYQKMHFST | KDSRIIDINK | VEMATGKMM   | 357 |
| C.crestentus | QIVKAYAEGD  | RETLTPLLAP  | DVMDNFERAM | VARETAGRTE | -KVEFLTPPR | VDLERVDVVG  | 177 |
|              |             |             |            |            |            |             |     |
| T.vaginalis  | --RMPSILVR  | CSADHTNEVI  | TMNSGTIVEG | GPQDICTHDF | LVVLTIDAS- | ---KDTPRWI  | 313 |
| S.cerevisiae | PQDIPVLVVG  | CRAQEINLYR  | KKKTGEIAAG | DEANILMSSY | AMVFTRDPEQ | IDDDTEGWK   | 418 |
| S.pombe      | PNDIPVFIVT  | FRTQEVHMFK  | DASSGELVAG | KDDRIQQCTY | ASVFTRVEDE | LDNPETRGWR  | 414 |
| P.infestans  | -KQAPIILMR  | FQAQQINCIR  | NRE-GEVVEG | SEDEVLAYYY | IFAFQRDYG- | -EEQETLRWR  | 454 |
| T.castaneum  | --QGPVLIIS  | FTSQQMCMVR  | DPN-GNVVEG | DPEKVMRVAY | VWVLCRDIS- | -EPDPRAAWR  | 411 |
| H.sapiens    | --QGPVLIIT  | FQAQLVMVVR  | NPK-GEVVEG | DPDKVLRMLY | VWALCRDQD- | -ELNPYAAWR  | 439 |
| C.elegans    | --QGPVLIIS  | FQVYMINVTK  | NAD-GKVVEG | DPDNPKRINH | IWVLCRDVE- | -EYNPALAWK  | 412 |
| C.crestentus | --DTAKAVVR  | ILAEVTRTRK  | DER-----G  | EGVDDRRTAE | LWTFEREVK- | ---STDPNWH  | 225 |
|              |             |             |            |            |            |             |     |
| T.vaginalis  | ASELRPDSTS  | NRI         | 326        |            |            |             |     |
| S.cerevisiae | ILEFVRGGSR  | QFT         | 431        |            |            |             |     |
| S.pombe      | IVDFARARAV  | DYF         | 427        |            |            |             |     |
| P.infestans  | IVDLHMQRGG  | RYY         | 467        |            |            |             |     |
| T.castaneum  | LLDLSASSNE  | QLV         | 424        |            |            |             |     |
| H.sapiens    | LLDISASSTE  | QIL         | 457        |            |            |             |     |
| C.elegans    | LLEVHMQETP  | LAL         | 425        |            |            |             |     |
| C.crestentus | LTFVAAAAEA- | ---         | 324        |            |            |             |     |
