# Supplementary material for: The Core Components of Organelle Biogenesis and Membrane Transport in the Hydrogenosomes of Trichomonas vaginalis
Source: PubMed Central journal article supplement (PMC3174187; doi:10.1371/journal.pone.0024428), 2011-09-15

A

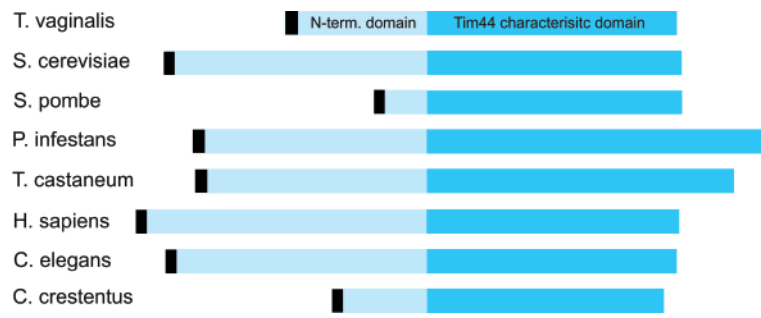

B

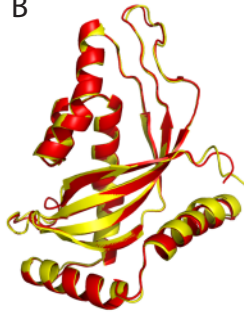

C

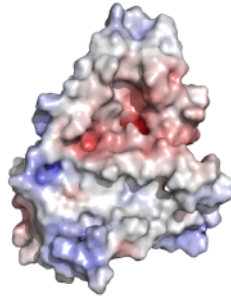

D

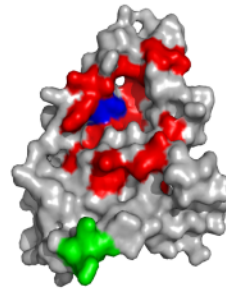

Supplement: pone.0024428.s008.pdf [file pone.0024428.s008.pdf]
