# Supplementary material for: The Core Components of Organelle Biogenesis and Membrane Transport in the Hydrogenosomes of Trichomonas vaginalis
Source: PubMed Central journal article supplement (PMC3174187; doi:10.1371/journal.pone.0024428), 2011-09-15

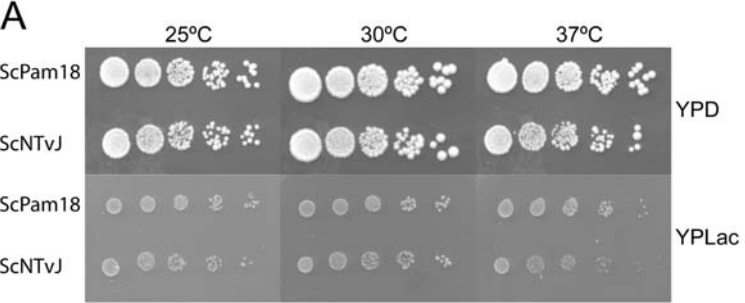

**B**

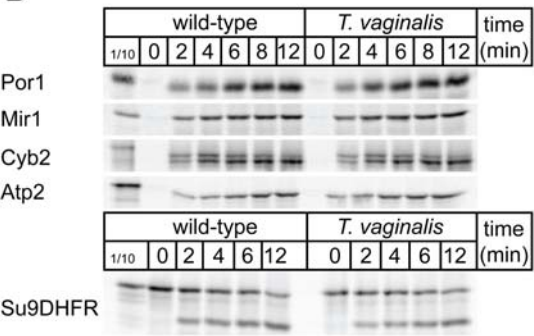

Supplement: pone.0024428.s009.pdf [file pone.0024428.s009.pdf]
